# Supplementary material
Source: PubMed Central journal article supplement (PMC3574938)
Supplement: 1211560110_pnas.201211560SI.pdf [file 1211560110_pnas.201211560SI.pdf]

# Supporting Information

Defour et al. 10.1073/pnas.1211560110

## SI Substitutions at Positions 514, 516, 517, and 518 Do Not Induce Activation of TpoR

The RWQFP motif is largely conserved in thrombopoietin receptor (TpoR) (Fig. S1), suggesting that each residue in the motif plays a role in the structure or activation mechanism of the receptor. Fig. S2 shows the ability of additional mutations at positions 514, 516, 517, and 518 to constitutively activate the receptor. The mutants were expressed in  $\gamma$ -2A cells cotransfected with JAK2 and tested for ligand-dependent and -independent induction of STAT5-dependent transcriptional activity using the dual luciferase assay.

## SI Constitutive Activation of TpoR by W515 Mutants Requires JAK2

In cells, TpoR signals mainly via JAK2 and to a lesser extent via TYK2 (1). We tested signaling of W515 mutants via STATs using the luciferase reporter assay in  $\gamma$ -2A cells, which are deficient in JAK2 but not TYK2 (2). Constitutive activation of STAT5 transcriptional activity is detected in  $\gamma$ -2A cells transfected with JAK2 for both the W515K and W515L mutations. In contrast, the level of ligand-induced and ligand-independent signaling is low in  $\gamma$ -2A cells transfected with TYK2. Data presented in Figs. S3 and S4 indicate that the TpoR W515K mutant is constitutively active only in the presence of JAK2 and not TYK2. Studies performed with engineered TpoR dimers indicate that the W515K mutation seems to induce a dimer interface that is not permissive for activation of TYK2 (Fig. S4). Thus, the dimer induced by the W515K must be distinct from the physiological dimer induced by Tpo.

We next compared signaling by one conformation that is inactive via TYK2 (cc-TpoR-I) in the presence of a constitutive active mutant of TYK2, TYK2 V678F, a mutant homologous to the activating V617F mutation in JAK2 (3). cc-TpoR-I becomes active in the presence of TYK2 V678F (Fig. S4C), suggesting that inactive dimeric conformations like cc-TpoR-I fail to trigger

TYK2 activation, but once this step accomplished, the receptor dimer could support downstream signaling.

## SI Comparison of the Association of TpoR with the Association of EpoR

Erythropoietin receptor (EpoR) and TpoR were fused in frame with Gluc1 and Gluc2 fragments and tested for *Gaussia princeps* luciferase complementation (Fig. S5).

## SI Temperature Dependence of Deuterium MAS Side Bands in the TpoR TM Peptides Labeled at Leu512

The loss of NMR intensity in the deuterium magic angle spinning (MAS) spectra of wild-type TpoR transmembrane (TM) peptides suggests that the motion of the peptide interferes with averaging by MAS. To test this idea, the sample temperature was decreased to slow the rotational diffusion of the peptide in the membrane bilayer (Fig. S6).

## SI Secondary Structure of the RWQFP Insert by Solution NMR Spectroscopy

Structural studies of TM peptides solubilized in detergent micelles can provide insights into peptide structure. We have undertaken solution NMR measurements of peptides corresponding to the TpoR TM-juxtamembrane (JM) sequence (residues 481–520) to complement our previous solid-state NMR measurements in membrane bilayers (4) and to complement the analytical ultracentrifugation measurements in this study of TpoR peptides solubilized in detergent micelles (Fig. S7). The peptides were expressed as an MBP-His-fusion protein as described by Itaya et al. (5). The MBP and His tags were removed by cleavage with Tobacco Etch Virus (TEV) protease, and the purified protein labeled with  $^{13}\text{C}$  and  $^{15}\text{N}$  was solubilized in deuterated SDS for NMR experiments.

1. Royer Y, Staerk J, Costuleanu M, Courtoy PJ, Constantinescu SN (2005) Janus kinases affect thrombopoietin receptor cell surface localization and stability. *J Biol Chem* 280(29):27251–27261.
2. Kohlhuber F, et al. (1997) A JAK1/JAK2 chimera can sustain alpha and gamma interferon responses. *Mol Cell Biol* 17(2):695–706.
3. Staerk J, Kallin A, Demoulin JB, Vainchenker W, Constantinescu SN (2005) JAK1 and Tyk2 activation by the homologous polycythemia vera JAK2 V617F mutation: Cross-talk with IGF1 receptor. *J Biol Chem* 280(51):41893–41899.

4. Kubatzky KF, et al. (2005) Structural requirements of the extracellular to transmembrane domain junction for erythropoietin receptor function. *J Biol Chem* 280(15):14844–14854.
5. Itaya M, Brett IC, Smith SO (2012) Synthesis, purification, and characterization of single helix membrane peptides and proteins for NMR spectroscopy. *Methods Mol Biol* 831: 333–357.

|                   |                                                                |     |
|-------------------|----------------------------------------------------------------|-----|
| Rabbit            | VLSLSALLGLLLLLKWQFPAHYRRLRHALWPSLPDLHRVVGQYLRDTAALSPPSKATVT-DS | 79  |
| Mouse             | VLSLSALLGLLLLLKWQFPAHYRRLRHALWPSLPDLHRVVGQYLRDTAALSPPSKATVT-DS | 550 |
| Cattle            | VLSVSALLGLLLLLRWQFPEHYRSLRHALWPSLPDLHRVVGQYLRDTAALSPPKAAVS-DV  | 557 |
| Human             | VLGLSAVLGLLLLLRWQFPAHYRRLRHALWPSLPDLHRVVGQYLRDTAALSPPKATVS-DT  | 559 |
| Crabeating monkey | VLGLSAVLGLLLLLRWQFPAHYRRLRHALWPSLPDLHRVVGQYLRDTAALSPPKATVS-DT  | 551 |
| Marmoset          | VLGLSALLGLLLLLRWQFPAHYRRLRHVLPWPSLPDLHRVVGQYLRDTAAPSPPKATVS-DT | 565 |
| Guinea pig        | VLGLSALLGLLLLLRWQFPAHYRRLRHVLPWPSLPDLHRVVGQYLRDTAAPSPPKATVS-DT | 552 |
| Rhesus monkey     | VLGLSALLGLLLLLRWQFPAHYRRLRHVLPWPSLPDLHRVVGQYLRDTAAPSPPKATVS-DA | 552 |
| Squirrel monkey   | VLGLSALLGLLLLLRWQFPAHYRRLRHVLPWPSLPDLHRVVGQYLRDTAAPSPPKATVS-DA | 552 |

–BOX1–

Fig. S1. Alignment of TpoR JM sequences (including W515, red) from different species. Box 1, conserved PxxPxP/x motif required for JAK binding in cytokine receptor type I superfamily.
